# Supplementary material for: Nutritional content of Totoaba macdonaldi (Gilbert, 1890), Antioxidants and lipid peroxidation in muscle
Source: PeerJ. 2021 Mar 31;9:e11129. doi: 10.7717/peerj.11129 (PMC8019309; doi:10.7717/peerj.11129)
Supplement: Supplemental Information 1 [file peerj-09-11129-s001.xlsx]

## Sheet: Hoja1
	Season	HABITAT	sex/maturity	LT (mm)	Cu µg/g M	Cd µg/g M	Pb µg/g M	Zn µg/g M	Fe µg/g M	Cu µg/g H	Cd µg/g H	Pb µg/g H	Zn µg/g H	Fe µg/g H
1	Winter	1	HM	1345	<0.017	<0.01	<0.017	16.2169	5.5966	45.7368	3.09345	<0.017	107.231	1474.16
2	Winter	1	HM	1310	2.84578	<0.01	<0.017	16.6787	13.3385	45.7455	1.65472	<0.017	114.097	1439.84
3	Winter	1	HM	1270	<0.017	<0.01	<0.017	15.0409	34.0849	90.4583	3.28656	<0.017	156.615	1124.89
4	Winter	1	HM	1330	2.68919	<0.01	<0.017	16.5188	23.1952	43.4228	4.22583	<0.017	130.371	1823.76
5	Winter	1	HM	1205	2.53635	<0.01	<0.017	17.4826	15.3297	68.2652	0.890325	<0.017	142.389	1005.83
6	Winter	1	HM	1285	3.63507	<0.01	<0.017	20.0427	30.3246	44.2513	1.71427	<0.017	148.914	1633.34
7	Winter	1	HM	1300	2.01455	<0.01	<0.017	17.7197	24.8769	28.6275	1.43895	<0.017	110.06	1054.11
8	Winter	1	HM	1320	<0.017	<0.01	<0.017	20.2588	14.4341	47.4525	1.75677	<0.017	137.692	1583.67
9	Winter	1	HM	1370	4.62715	<0.01	<0.017	15.5319	28.8378	33.589	0.753178	<0.017	132.059	1150.58
10	Winter	1	HM	1360	2.25565	<0.01	<0.017	15.8635	16.5884	26.5263	0.787542	<0.017	92.7784	719.341
11	Winter	1	HM	1360	1.84481	<0.01	<0.017	14.8765	34.2224	18.4778	0.0229625	<0.017	58.2429	804.325
12	Winter	1	HM	1375	<0.017	<0.01	<0.017	17.6468	26.1154	21.1601	2.96704	<0.017	74.7537	974.445
13	Winter	1	HM	1385	<0.017	<0.01	<0.017	15.1731	11.5144	68.829	1.86376	<0.017	136.128	1833.47
14	Winter	1	HM	1505	2.78303	<0.01	<0.017	29.3772	43.428	44.0109	2.04302	<0.017	108.202	1831.04
15	Winter	1	HM							33.991	0.741169	<0.017	92.5024	816.254
16	Winter	1	MM	1210	<0.017	<0.01	<0.017	15.4032	24.3559	32.6577	1.04722	<0.017	94.1942	1020.13
17	Winter	1	MM	1535	<0.017	<0.01	<0.017	19.419	12.5726	38.6168	20.937	<0.017	126.082	3151.6
18	Winter	1	MM	1280	2.43384	<0.01	<0.017	16.2789	19.3818	37.7253	1.10359	<0.017	95.7253	897.655
19	Winter	1	MM	1165	<0.017	<0.01	<0.017	14.9027	7.99935	23.2255	1.44729	<0.017	104.761	737.745
20	Winter	1	MM	1220	<0.017	<0.01	<0.017	12.9696	4.28856	46.2596	4.33843	<0.017	126.624	1738.45
21	Winter	1	MM	1315	<0.017	<0.01	<0.017	16.0149	3.13046	28.2354	6.41287	<0.017	106.004	754.123
22	Winter	1	MM	1260	<0.017	<0.01	<0.017	15.3929	3.01212	37.3917	1.02518	<0.017	111.229	379.039
23	Winter	1	MM	1260	3.75429	<0.01	<0.017	21.8679	79.2329	28.8457	1.07046	<0.017	86.5835	630.685
24	Winter	1	MM	1250	2.73702	<0.01	<0.017	16.487	20.5093	40.1779	1.95844	<0.017	133.541	1821.06
25	Winter	1	MM	1330	3.18178	<0.01	<0.017	20.8821	16.7751	21.081	0.800844	<0.017	93.434	1110.08
26	Winter	1	MM	1450	2.59067	<0.01	<0.017	18.0229	17.5046	13.9676	0.20427	<0.017	55.5017	854.631
27	Winter	1	MM	1370	0.204257	<0.01	<0.017	17.3355	14.9864	39.9171	0.321109	<0.017	87.6074	793.943
28	Winter	1	MM	1290	2.80378	<0.01	<0.017	16.546	15.3866	39.6791	3.20009	<0.017	108.366	1067.86
29	Winter	1	MM		2.77966	<0.01	<0.017	21.6508	28.3727	33.4317	1.62696	<0.017	107.354	755.451
30	Winter	1	MM	1375	2.01589	<0.01	<0.017	24.8546	33.427	38.5172	0.698735	<0.017	104.568	1004.42
31	Winter	1	MM	1300	<0.017	<0.01	<0.017	15.0007	17.2176	49.1233	2.85258	<0.017	152.233	1516.09
32	Winter	1	MM	1250	2.73421	<0.01	<0.017	20.276	22.8516	40.8722	2.36608	<0.017	123.409	1468.35
33	Winter	1	MM	1175	2.41959	<0.01	<0.017	16.7194	26.7582	55.3886	5.85675	<0.017	126.454	1665.6
34	Autumn	2	HI	738	<0.017	<0.01	<0.017	14.9631	<0.65	41.4986	10.6707	<0.017	122.978	1942.68
35	Autumn	2	HI	770	0.0403421	<0.01	<0.017	13.576	<0.65	27.0235	10.1858	<0.017	99.7159	1581.9
36	Autumn	2	HI	857	<0.017	<0.01	<0.017	10.561	<0.65	47.2067	8.82022	<0.017	150.236	2362.7
37	Autumn	2	HI	745	1.19687	<0.01	<0.017	19.9841	5.44741	54.1674	8.83941	<0.017	129.325	1766.85
38	Autumn	2	HI	610	1.29603	<0.01	<0.017	10.0795	<0.65	21.5451	1.35367	<0.017	115.702	2540.49
39	Autumn	2	HI	705	<0.017	<0.01	<0.017	15.8412	19.8384	27.9807	2.97633	<0.017	93.4748	1079.32
40	Autumn	2	HI	740	<0.017	<0.01	<0.017	9.07933	<0.65	39.2208	6.43431	<0.017	79.3156	1760.64
41	Autumn	2	HI	690	<0.017	<0.01	<0.017	11.5027	2.34435	19.5788	3.46599	<0.017	133.405	2038.03
42	Autumn	2	HI	780	0.366199	<0.01	<0.017	18.3439	17.3359	19.7447	5.16847	<0.017	81.5918	576.326
43	Autumn	2	HI	1027	<0.017	<0.01	<0.017	14.7559	27.2718	18.3976	2.80508	<0.017	74.428	935.033
44	Autumn	2	HI	1130	1.75734	<0.01	<0.017	3.80316	9.96871	5.55811	2.02059	<0.017	25.3941	879.757
45	Autumn	2	HI	1056	1.14481	<0.01	<0.017	4.34689	13.3472	24.59	3.67763	<0.017	21.1378	785.709
46	Autumn	2	I	765	0.458506	<0.01	<0.017	17.3634	12.43	19.1989	4.52595	<0.017	85.2235	1703.64
47	Autumn	2	I	805	<0.017	<0.01	<0.017	9.08877	0.660441	22.868	3.57286	<0.017	108.533	1527.18
48	Autumn	2	I	780	<0.017	<0.01	<0.017	12.2468	<0.65	16.2946	1.94575	<0.017	83.8037	694.76
49	Autumn	2	I	780	<0.017	<0.01	<0.017	13.6728	5.47564	22.9875	7.6542	<0.017	82.306	1837.34
50	Autumn	2	I	700	<0.017	<0.01	<0.017	10.7746	<0.65	22.5814	3.33608	<0.017	107.152	1327.93
51	Autumn	2	I	698	<0.017	<0.01	<0.017	11.3215	<0.65	25.6386	7.02982	<0.017	104.829	1336.63
52	Autumn	2	I	745	0.0402482	<0.01	<0.017	15.3004	7.69777	24.3925	5.23264	<0.017	115.573	1641.9
53	Autumn	2	I	680	<0.017	<0.01	<0.017	11.6329	<0.65	19.9112	5.44681	<0.017	124.988	2158.96
54	Autumn	2	I	810	<0.017	<0.01	<0.017	9.36456	2.21225	53.6621	7.24099	<0.017	136.635	2915.67
55	Autumn	2	I	810	<0.017	<0.01	<0.017	15.1361	<0.65	41.6597	13.4138	<0.017	121.333	3589.16
56	Autumn	2	I	850	<0.017	<0.01	<0.017	11.014	7.77885	68.3628	8.31392	<0.017	87.601	628.137
57	Autumn	2	I	730	<0.017	<0.01	<0.017	12.1582	10.1871	20.7923	4.51825	<0.017	117.961	1642.25
58	Autumn	2	I	770	<0.017	<0.01	<0.017	9.43544	<0.65	21.8275	5.32659	<0.017	87.8914	911.382
59	Autumn	2	I	773	<0.017	<0.01	<0.017	10.9477	9.10972	22.3891	6.35589	<0.017	107.78	2473.85
60	Autumn	2	I	744	<0.017	<0.01	<0.017	10.7848	11.5233	16.5912	2.0603	<0.017	104.862	1240.73
61	Autumn	2	I	1043	<0.017	<0.01	<0.017	13.9519	24.3948	20.2869	7.35368	<0.017	80.1039	2509.69
62	Autumn	2	I	940	<0.017	<0.01	<0.017	11.7386	19.9482	7.53839	3.265	<0.017	90.2493	3147.68
63	Autumn	2	I	1191	<0.017	<0.01	<0.017	11.0151	22.6421	30.4799	2.1689	<0.017	64.8258	1403.96
64	Autumn	2	I	1138	<0.017	<0.01	<0.017	14.3847	37.4609	22.3977	4.59082	<0.017	91.2902	2402.17
65	Autumn	2	I	1150	<0.017	<0.01	<0.017	4.58649	23.0799	15.5324	1.23119	<0.017	21.5901	556.019
66	Autumn	2	I	1250	0.330838	<0.01	<0.017	10.7421	33.2329	28.3665	7.44615	<0.017	91.5237	1985.72
67	Autumn	2	MI	860	0.20897	<0.01	<0.017	11.3763	<0.65	32.7177	8.84902	<0.017	121.953	1038.36
68	Autumn	2	MI	765	<0.017	0.0209814	<0.017	12.9619	8.34725	29.1833	13.9618	<0.017	137.735	2866.33
69	Autumn	2	MI	808	0.0402015	<0.01	<0.017	9.86616	6.44046	15.4923	6.40277	<0.017	116.836	1106.9
70	Autumn	2	MI	755	<0.017	<0.01	<0.017	14.7312	3.46096	27.0883	4.61556	<0.017	106.687	709.498
71	Autumn	2	MI	800	<0.017	<0.01	<0.017	11.5557	3.14242	28.6677	4.80585	<0.017	117.827	1452.19
72	Autumn	2	MI	728	9.03093	<0.01	<0.017	11.5576	<0.65	50.3297	9.35002	<0.017	119.917	2035.93
73	Autumn	2	MI	1105	<0.017	<0.01	<0.017	12.2425	26.3359	19.4869	7.33086	<0.017	74.2367	3858.37
74	Autumn	2	MI	915	<0.017	<0.01	<0.017	16.7052	35.8725	21.3819	7.69577	<0.017	72.8668	2814.72
75	Autumn	2	MI	803	0.61208	<0.01	<0.017	11.329	24.4578	25.777	3.30555	<0.017	106.336	3253.89
76	Autumn	2	MI	1360	<0.017	<0.01	<0.017	15.2159	46.7691	81.2046	5.94374	<0.017	86.2174	1950.66
77	Autumn	2	MI	1040	8.54852	<0.01	<0.017	3.49276	10.5002	13.4615	1.53318	<0.017	15.5025	481.131
78	Autumn	3	HI	1080	1.99723	<0.01	<0.017	14.4694	21.7932	28.2337	2.65903	<0.017	101.744	700.935
79	Autumn	3	HI	1050	<0.017	<0.01	<0.017	10.6292	11.8153	14.5823	1.96574	<0.017	92.676	352.66
80	Autumn	3	HI	1070	5.33045	<0.01	<0.017	8.89655	14.7472	16.8541	0.966277	<0.017	129.851	375.369
81	Autumn	3	HI	1095	2.74567	<0.01	<0.017	14.1361	23.0019	12.3591	0.803297	<0.017	67.5222	241.09
82	Autumn	3	HI	1050	<0.017	<0.01	<0.017	9.25656	21.5881	7.96925	1.19089	<0.017	121.362	293.784
83	Autumn	3	HI	1140	2.27545	<0.01	<0.017	11.9223	21.197	12.4498	0.408417	<0.017	64.787	488.133
84	Autumn	3	HI	1125	<0.017	<0.01	<0.017	11.7188	21.9783	17.609	0.992169	<0.017	66.2689	214.316
85	Autumn	3	HI	1220	<0.017	<0.01	<0.017	11.3054	16.5667	31.8362	1.64918	<0.017	96.3276	692.943
86	Autumn	3	HI	1045	<0.017	<0.01	<0.017	9.88412	10.9135	4.88521	1.29617	<0.017	65.7219	244.019
87	Autumn	3	I	1035	<0.017	<0.01	<0.017	11.2472	30.0492	21.825	4.01999	<0.017	171.501	855.029
88	Autumn	3	I	975	<0.017	<0.01	<0.017	12.3168	25.5497	28.7094	2.0656	<0.017	100.937	230.046
89	Autumn	3	I	1055	<0.017	<0.01	<0.017	13.2212	12.0425	38.2418	1.10933	<0.017	93.2677	396.345
90	Autumn	3	I	975	<0.017	<0.01	<0.017	11.0796	40.9668	10.5665	0.957785	<0.017	81.9944	477.712
91	Autumn	3	I	720	3.01845	<0.01	<0.017	14.6328	56.8934	17.2864	3.02832	<0.017	117.315	168.829
92	Autumn	3	I	1005	1.83803	0.0081139	<0.017	13.1914	24.5646
93	Autumn	3	I	1075	<0.017	1.0048	<0.017	15.8529	28.2904	8.80626	3.12764	<0.017	116.747	690.09
94	Autumn	3	MI	1040	<0.017	<0.01	<0.017	12.7068	32.5835	3.1328	0.948677	<0.017	71.0372	434.53
95	Autumn	3	MI	1025	1.15945	<0.01	<0.017	10.8816	4<0.0129535964985	16.3436	0.901372	<0.017	63.7415	542.045
96	Autumn	3	MI	1150	2.68181	<0.01	<0.017	13.2767	54.3041	15.5833	1.32305	<0.017	68.0543	450.628
97	Autumn	3	MI	1005	<0.017	<0.01	<0.017	9.3891	17.8158	7.51422	1.23539	<0.017	96.2643	327.409
98	Autumn	3	MI	965	<0.017	<0.01	<0.017	9.33665	5.87146	8.5445	0.856058	<0.017	81.5443	197.482
99	Autumn	3	MI	1060	<0.017	<0.01	<0.017	10.656	17.0044	23.6074	0.803096	<0.017	68.3589	190.883
100	Autumn	3	MI	1111	<0.017	<0.01	<0.017	10.6464	57.3445	7.88812	1.40702	<0.017	81.1985	369.741
101	Autumn	3	MI	1106	<0.017	<0.01	<0.017	10.7049	40.4296
102	Spring	1	HM	1230	2.6834	<0.01	<0.017	16.7156	21.5115	20.2399	0.001	<0.017	64.9601	210.866
103	Spring	1	HM	1165	1.94147	<0.01	<0.017	14.52	19.4422	11.5392	0.001	<0.017	48.8458	224.98
104	Spring	1	HM	1140	2.32923	<0.01	<0.017	15.1813	24.5538	23.9143	0.372427	<0.017	77.4242	436.3
105	Spring	1	HM	1417	<0.017	<0.01	<0.017	12.4042	16.1686	45.3829	0.915882	0.771499	92.0372	761.693
106	Spring	1	HM	1499	<0.017	<0.01	<0.017	13.6402	23.0272	10.4619	3.06373	<0.017	68.5564	1345.7
107	Spring	1	HM	1232	<0.017	<0.01	<0.017	17.6353	32.3631	44.1951	0.128164	<0.017	96.8253	476.875
108	Spring	1	HM	1160	<0.017	<0.01	<0.017	16.4676	14.4016	63.9564	1.85266	<0.017	107.377	560.032
109	Spring	1	HM	1344	<0.017	<0.01	<0.017	14.6264	21.9012	68.4903	0.793976	<0.017	89.4665	973.573
110	Spring	1	MM	1210	1.16935	<0.01	<0.017	15.0643	24.6248	12.6105	2.36968	<0.017	59.9408	702.564
111	Spring	1	MM	1300	1.85914	<0.01	<0.017	19.1048	27.4262	32.8208	0.268639	<0.017	82.4716	541.377
112	Spring	1	MM	1175	<0.017	<0.01	<0.017	13.0445	15.4091	22.9314	0.0615635	<0.017	74.3563	640.591
113	Spring	2	HI	1100	<0.017	<0.01	<0.017	10.6361	10.9903	21.9881	1.03971	<0.017	79.7806	442.458
114	Spring	2	HI	870	<0.017	<0.01	<0.017	12.4841	5.76132
115	Spring	2	HI	675	<0.017	<0.01	<0.017	13.3967	19.3501
116	Spring	2	HI	1090	<0.017	<0.01	<0.017	12.2188	15.0298	18.1679	0.001	<0.017	62.7039	557.709
117	Spring	2	HI	724	<0.017	<0.01	<0.017	11.0515	6.50662	53.2948	3.98402	<0.017	130.272	420.51
118	Spring	2	HI	745	<0.017	<0.01	<0.017	11.6711	5.6761	13.4225	0.001	<0.017	90.5155	405.616
119	Spring	2	HI	745	<0.017	<0.01	<0.017	11.5368	8.40923	27.8683	0.0561387	<0.017	98.0082	732.97
120	Spring	2	HI	945	<0.017	<0.01	<0.017	12.7498	14.6309	22.9068	0.001	<0.017	81.0759	559.472
121	Spring	2	HI	937	<0.017	<0.01	<0.017	15.0478	26.6188	11.4475	0.001	<0.017	56.6922	250.424
122	Spring	2	HI	1000			<0.017			18.0187	0.001	<0.017	94.7171	583.884
123	Spring	2	HI	967	<0.017	<0.01	<0.017	10.6544	2.88664	15.1229	0.0940721	<0.017	74.8046	781.867
124	Spring	2	HI	954	<0.017	<0.01	<0.017	14.7054	19.8167	16.5798	0.001	<0.017	96.2017	944.567
125	Spring	2	HI	985	<0.017	<0.01	<0.017	12.876	5.05055	20.9966	0.028449	<0.017	88.5714	477.877
126	Spring	2	HM	1860	5.54076	<0.01	<0.017	26.6952	40.9352	17.9613	6.74165	<0.017	65.3356	1066.71
127	Spring	2	HM	1170	4.53494	<0.01	<0.017	21.9881	40.2928	23.1022	0.10461	<0.017	66.1679	528.651
128	Spring	2	HM	1175	1.55779	<0.01	<0.017	7.52729	12.8609	31.3834	0.411291	<0.017	72.811	364.239
129	Spring	2	HM	1320	0.132891	0.029389	<0.017	14.1644	14.3353	17.8367	2.16206	<0.017	64.302	526.077
130	Spring	2	HM	1220	1.11364	0.0231592	<0.017	5.28263	7.2846	32.6361	1.20761	<0.017	72.2444	371.372
131	Spring	2	HM	1210	0.445957	<0.01	<0.017	4.92526	4.97256	23.0113	0.277592	<0.017	70.8533	639.716
132	Spring	2	HM	1180	0.727106	0.133797	<0.017	16.4677	32.6361	23.7441	0.622026	<0.017	74.2081	397.868
133	Spring	2	MI	1010	0.666166	0.0289006	<0.017	12.7941	35.1236	52.857	4.04869	<0.017	129.626	1956.55
134	Spring	2	MI	1150	1.27393	0.0785495	<0.017	13.8269	30.0831	20.2325	2.30001	<0.017	67.0148	1303.65
135	Spring	2	MI	865	<0.017	<0.01	<0.017	12.8287	17.4728	19.3268	0.001	<0.017	72.9904	439.751
136	Spring	2	MI	835	<0.017	<0.01	<0.017	15.0985	28.4227	23.0974	0.0325477	<0.017	65.7466	504.754
137	Spring	2	MI	905	<0.017	<0.01	<0.017	15.5219	13.269	9.05088	0.001	<0.017	50.331	279.711
138	Spring	2	MI	745	<0.017	<0.01	<0.017	12.977	7.05667	15.8418	0.001	<0.017	73.6097	235.728
139	Spring	2	MM	1000	1.20001	<0.01	<0.017	11.0175	8.2125	8.86696	1.19184	<0.017	70.2344	706.573
140	Spring	2	MM	1120	1.15716	0.024401	<0.017	3.98786	6.53816	16.7437	1.45366	<0.017	67.7038	783.532
141	Spring	2	MM	1150	0.728689	<0.01	<0.017	13.3138	13.6782	21.6801	0.843503	<0.017	53.7248	482.597
142	Spring	2	MM	1210	<0.017	0.0547525	<0.017	13.396	14.6758	11.8877	0.687015	<0.017	69.2398	638.69
143	Spring	2	MM	1005	<0.017	<0.01	<0.017	12.5949	12.6762	16.8173	0.301378	<0.017	84.3576	1242.61
144	Spring	2	MM	990	<0.017	<0.01	<0.017	12.2528	10.3134	13.4951	0.001	<0.017	89.7019	583.397
145	Spring	2	MM	937	<0.017	<0.01	<0.017	14.0119	20.4565	22.156	2.80852	<0.017	108.553	262.09
146	Spring	2	MM	1125	<0.017	<0.01	<0.017	13.7778	15.3826	48.9912	2.70433	<0.017	95.3686	1806.32
